# Supplementary material
Source: publisher figshare collection journal article supplement (https://future-science-group.figshare.com/ndownloader/files/28532787)
Supplement: Supplementary file 1 [file 28532787]

**Supplemental Table 3: Baseline characteristics of stage I-II patients between patients with radiation and patients without radiation**

| **Variable** | **Radiation** | **No radiation** | **P value** |
| --- | --- | --- | --- |
| **Stage** |  |  | **<0.001** |
| I | 3160 (48.3%) | 7924 (95.8%) |  |
| II | 3386 (51.7%) | 345 (4.2%) |  |
| **Histology** |  |  | **<0.001** |
| squamous cell carcinoma | 6489 (99.1%) | 8245 (99.7%) |  |
| Small cell carcinoma | 57 (0.9%) | 24 (0.3%) |  |
| **Age(years)** |  |  | **<0.001** |
| 18-39 | 1408 (21.5%) | 3647 (44.1%) |  |
| 40-59 | 3031 (46.3%) | 3340 (40.4%) |  |
| ≥60 | 2050 (31.3%) | 1258 (15.2%) |  |
| **Marital status** |  |  | **<0.001** |
| Married | 2550 (39.0%) | 3637 (44.0%) |  |
| Single | 3735 (57.1%) | 3968 (48.0%) |  |
| Unknown | 261 (4.0%) | 664 (8.0%) |  |
| **Race** |  |  | **<0.001** |
| Black | 1181 (18.0%) | 1088 (13.2%) |  |
| White | 4706 (71.9%) | 6220 (75.2%) |  |
| Other | 659 (10.1%) | 961 (11.6%) |  |
| **Grade** |  |  | **<0.001** |
| Grade I-II | 2606 (39.8%) | 3418 (41.3%) |  |
| Grade III-IV | 2483 (37.9%) | 1700 (20.6%) |  |
| Unknown | 1457 (22.3%) | 3151 (38.1%) |  |
